# Supplementary material for: Sustained protection against Ebola virus infection following treatment of infected nonhuman primates with ZMAb
Source: PubMed Central journal article supplement — Sci Rep. 2013 Nov 28;3:3365. doi: 10.1038/srep03365 (PMC3842534; doi:10.1038/srep03365), 2013-11-28
Supplement: srep03365-s1.pdf [file srep03365-s1.pdf]

# **Sustained protection against Ebola virus infection following treatment of infected nonhuman primates with ZMAb**

Xiangguo Qiu<sup>1</sup>, Jonathan Audet<sup>2</sup>, Gary Wong<sup>2</sup>, Lisa Fernando<sup>1</sup>, Alexander Bello<sup>2</sup>, Judie B.  
Alimonti<sup>1,2</sup> and Gary P. Kobinger<sup>1,2,3,4,\*</sup>

# Supplementary Figure 1

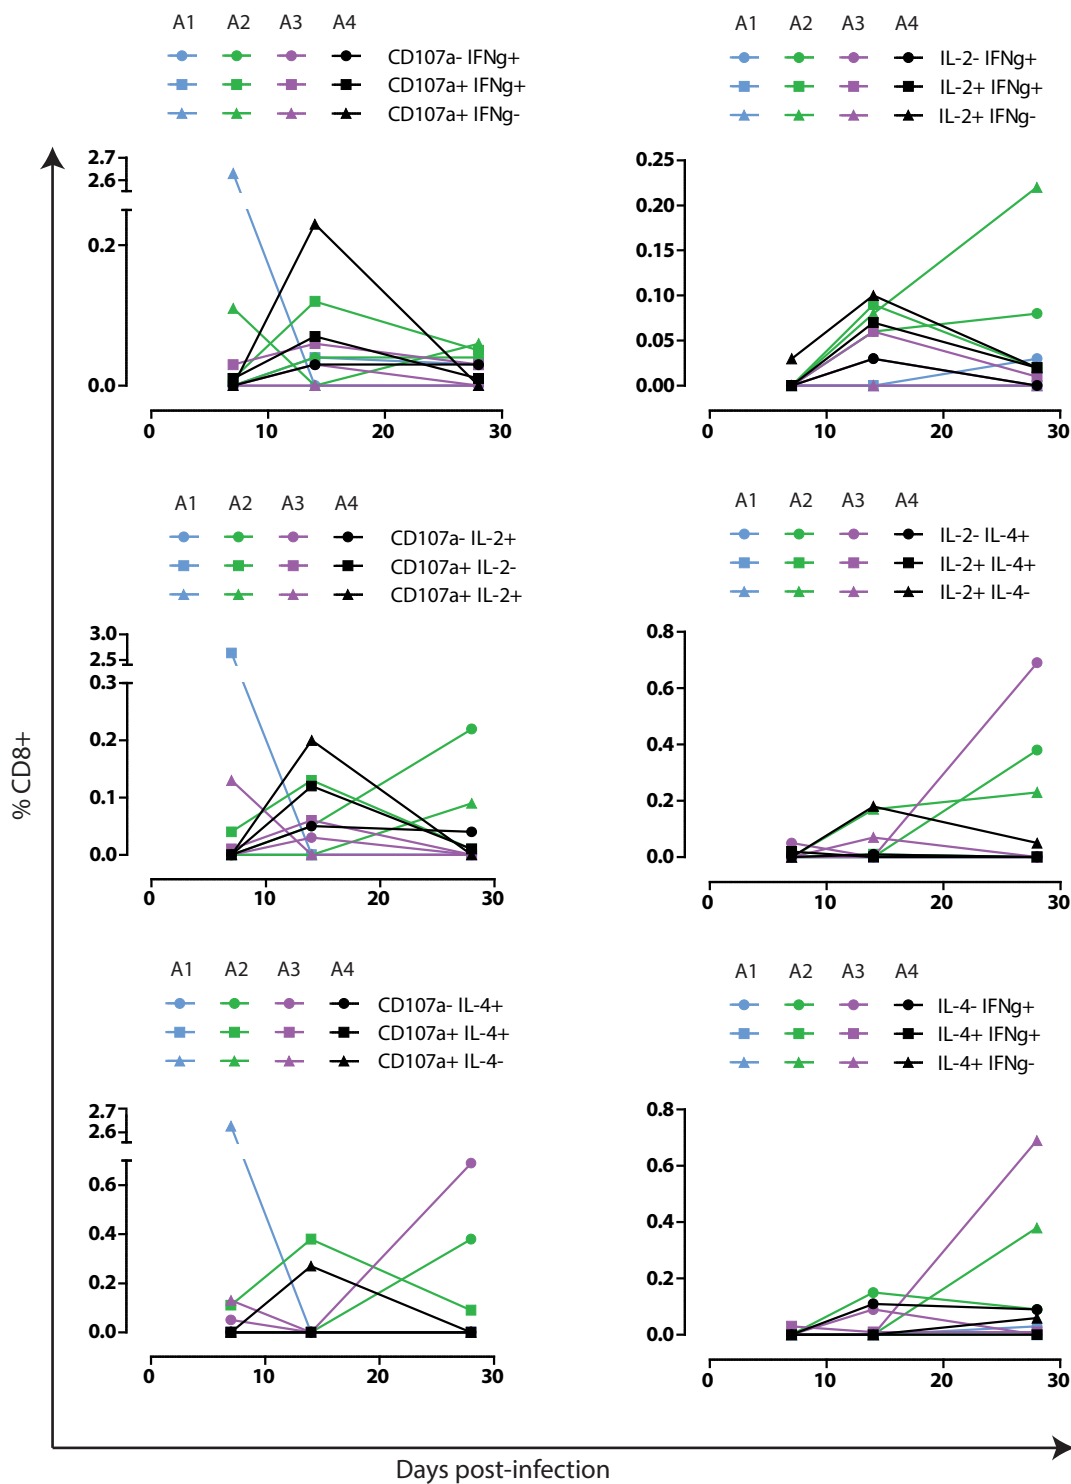

**Supplementary Figure S1.** CD8 T-cells double positive for various activation markers. Each graph is a separate combination. Animals are distinguished by color, activation patterns (-, +; +, +; +, -) are distinguished by symbol. The data was generated by using a quad-gate plot of the markers (e.g.: IFN- $\gamma$  vs IL-2). To be considered positive, a combination had to have at least twice the frequency of the media-only sample in a pool. For flow cytometry, a response was considered positive if it was at least twice the media only background, in which case the background value was subtracted. The graphs represent the sum of the three pools.

# Supplementary Figure 2

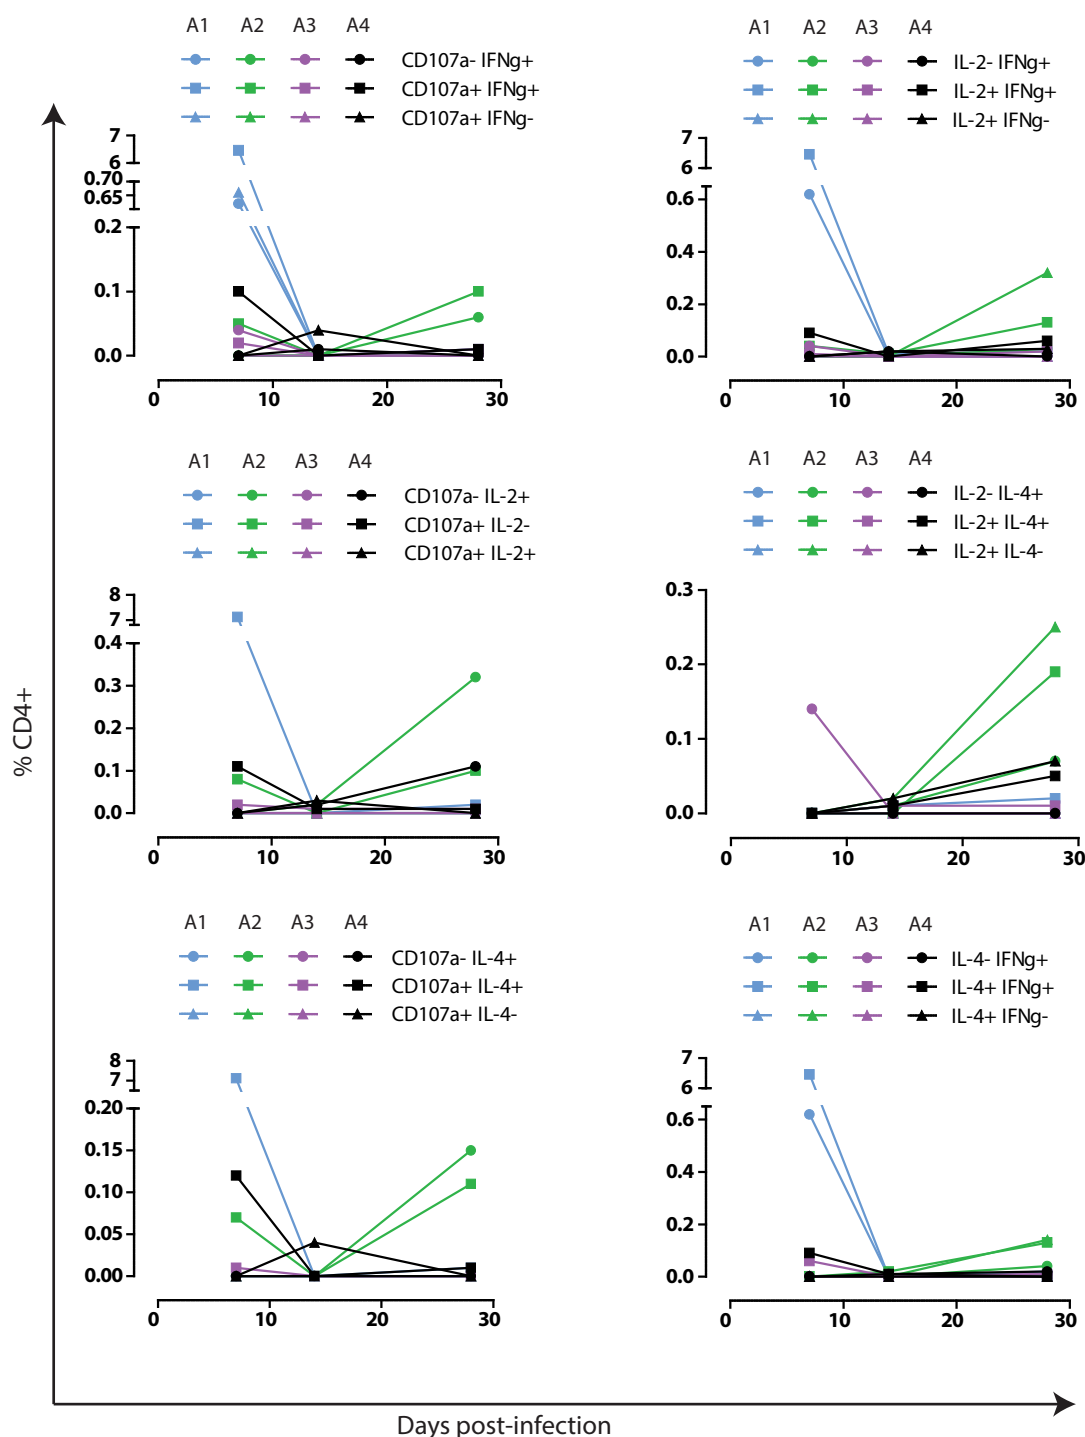

**Supplementary Figure S1.** CD4 T-cells double positive for various activation markers. Each graph is a separate combination. Animals are distinguished by color, activation patterns (-, +; +, +; +, -) are distinguished by symbol. The data was generated by using a quad-gate plot of the markers (e.g.: IFN- $\gamma$  vs IL-2). To be considered positive, a combination had to have at least twice the frequency of the media-only sample in a pool. For flow cytometry, a response was considered positive if it was at least twice the media only background, in which case the background value was subtracted. The graphs represent the sum of the three pools.

**Supplementary Table 1. Ebola viremia values at various times post-challenge as measured by quantitative RT-PCR.**

| dpi | A1      | A2 | A3 | A4       | A5 | A6      | B1      | B2      |
|-----|---------|----|----|----------|----|---------|---------|---------|
| 0   | 0       | 0  | 0  | 0        | 0  | 0       | 0       | 0       |
| 3   | ND      | ND | ND | 3.37E00  | ND | ND      | 1.36E02 | 1.13E03 |
| 5   |         |    |    |          |    |         | 5.01E06 |         |
| 7   | ND      | ND | ND | 7.31E03* | ND | 7.25E07 |         | 4.35E05 |
| 14  | 5.27E00 | ND | ND |          | ND |         |         |         |
| 21  | ND      | ND | ND |          | ND |         |         |         |
| 28  | ND      | ND | ND |          | ND |         |         |         |

Limit of detection is 86 GEC.

Values are expressed as genome copies per mL (GEC/mL) of blood. ND: not detected, empty boxes represent sampling not performed

\*The data here may not represent the true data as there were precipitates in the AVL sample of this animal.
